# Supplementary material for: The construction and analysis of tumor-infiltrating immune cells and ceRNA networks in metastatic adrenal cortical carcinoma
Source: PubMed Central journal article supplement (PMC7103591; doi:10.1042/bsr20200049), 2020-03-27
Supplement: BSR-2020-0049_supp.pdf [file BSR-2020-0049_supp.pdf]

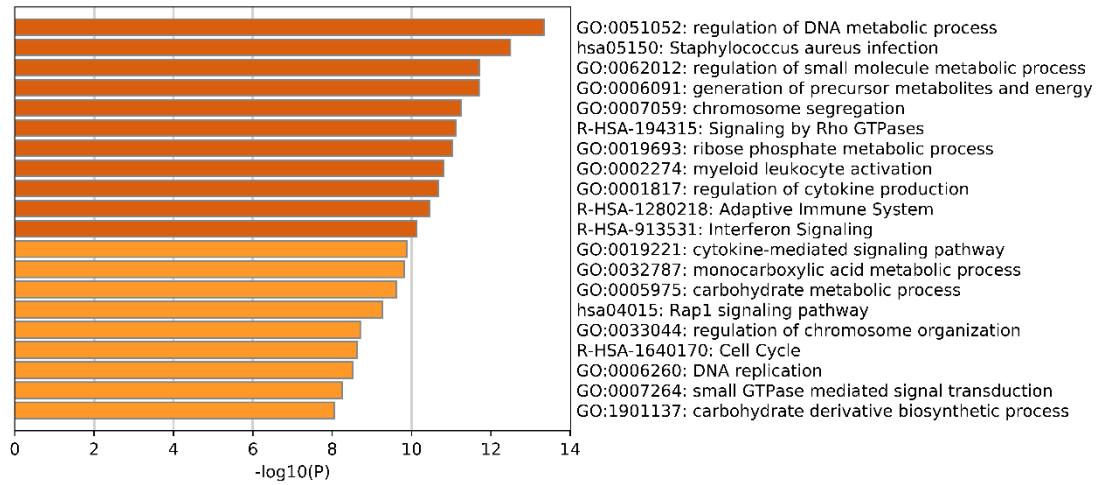

**Figure S1** The results of the enrichment analysis of differentially expressed genes associated with metastasis, which revealed immune system and genetic material biological processes or pathways.

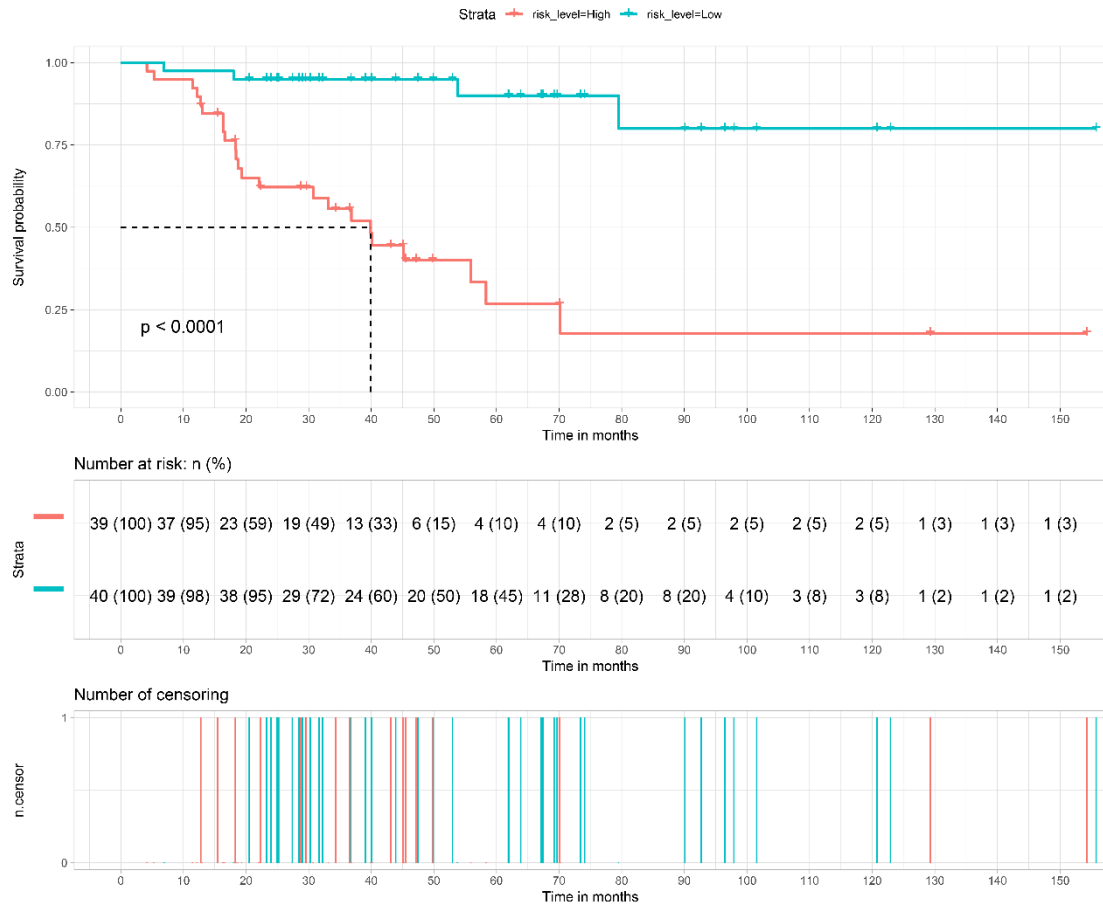

**Figure S2** The Kaplan–Meier survival curve revealed a significant correlation between risk level defined by the multivariable model including immune cells and survival of ACC ( $P < 0.001$ ).





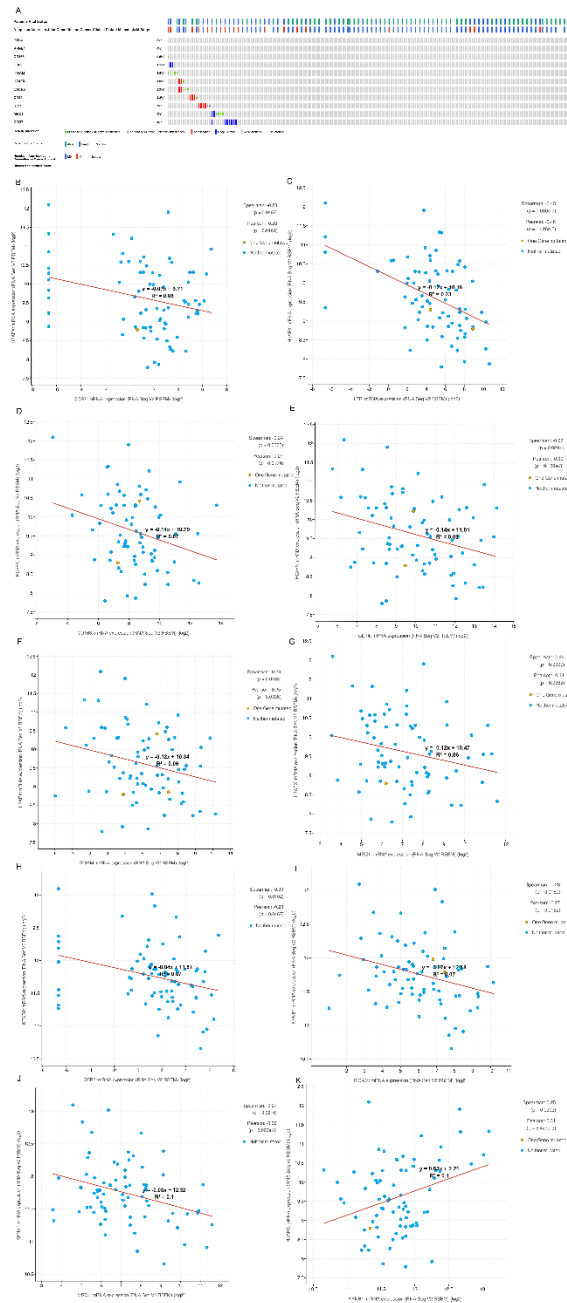

**Figure S5** The results of genomics and clinical data analyzed by cBioPortal.

Comprehensive analysis of genomics and clinical data in cBioPortal database showed that CCR7, CXCR5, IL7R CD68, CD163, CD14, ITGAM, MRC1 and H2AFX had genomic alteration in primary ACC (A). In addition, H2AFX had significant co-expression patterns with markers of T cells CD4 memory CCR7 ( $P = 0.046$ ), IL7R ( $P < 0.001$ ) and macrophage M0 markers CD163 ( $P = 0.037$ ), CD14 ( $P = 0.020$ ), ITGAM ( $P = 0.043$ ) and MRC1 ( $P = 0.038$ ) in ACC (B-G). KPNB1 also had significant co-expression with CCR7 ( $P = 0.010$ ), ITGAM ( $P = 0.016$ ), MRC1( $P = 0.021$ ) and H2AFX ( $P = 0.006$ ) (H - K).

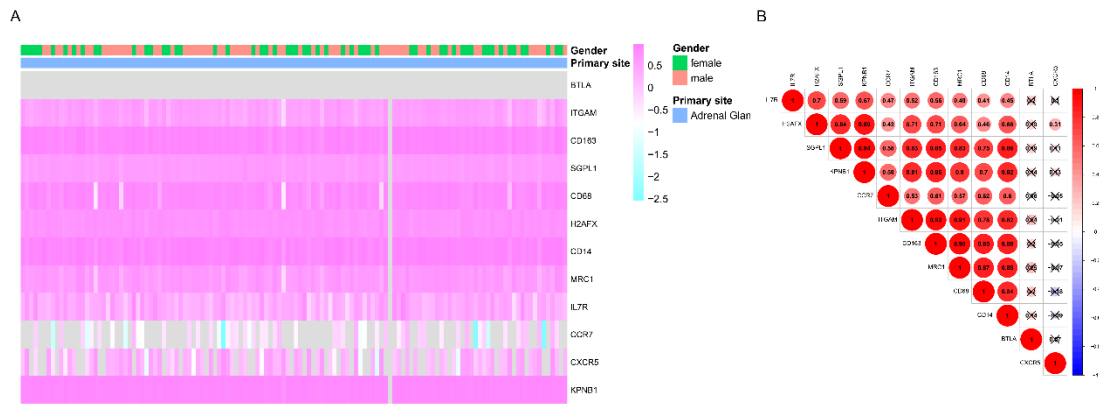

**Figure S6** The heatmap (A) and co-expression analysis (B) of KPNB1, H2AFX, SGPL1 and cell markers.

In the normal adrenal tissues in the GTEx database, KPNB1, H2AFX, SGPL1 had significant co-expression patterns with almost all cell markers (CCR7, IL7R CD68, CD163, CD14, ITGAM, MRC1).

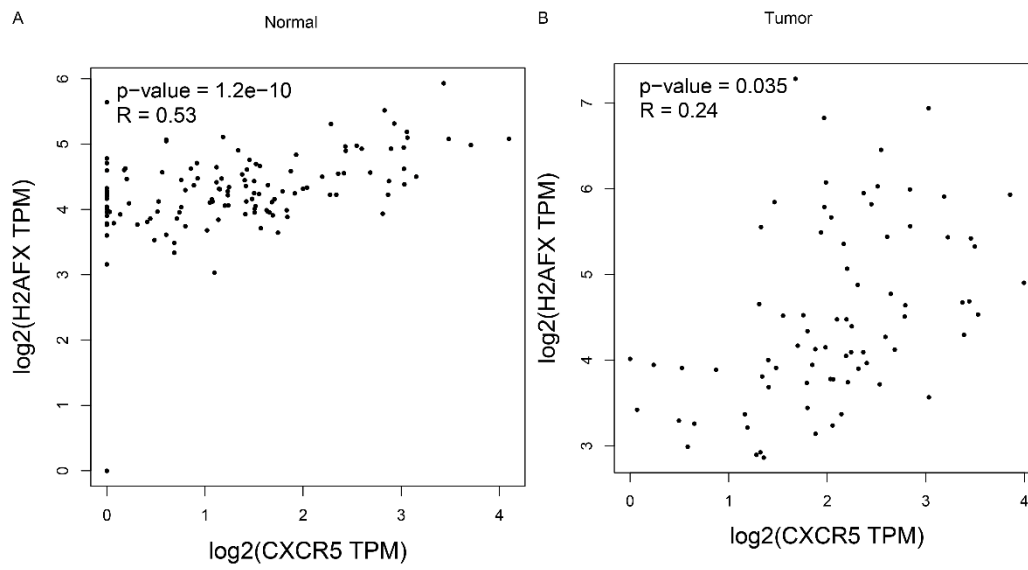

**Figure S7** In GEPIA database, H2AFX and CXCR5 were co-expressed in normal adrenal tissues (A) and ACC (B).

GEPIA database analysis showed the co-expression pattern of H2AFX and CXCR5 in normal adrenal tissues and ACC.

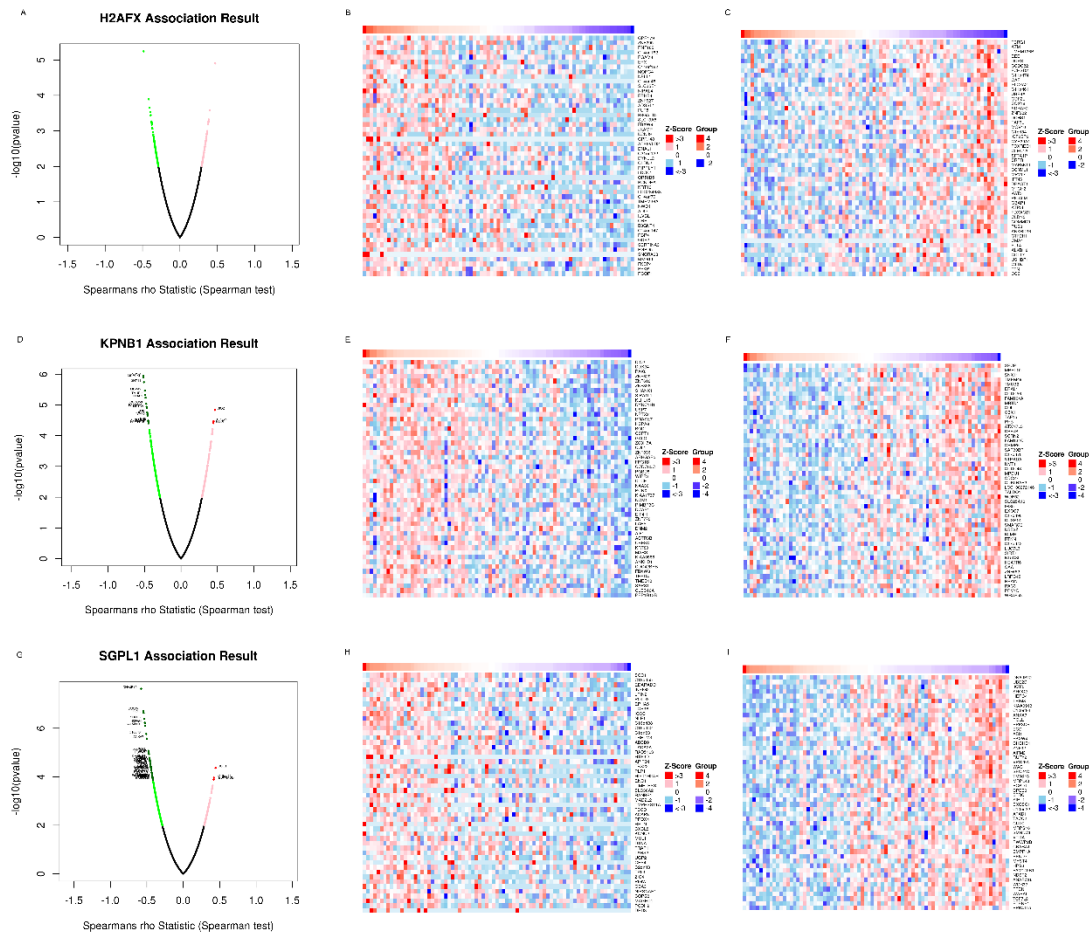

**Figure S8** The data mining results of LinkedOmics database.

The LinkedOmics database showed that KPNB1 (A, B, C), H2AFX (D, E, F) and SGPL1 (G, H, I) had significant co-expression of many immune-related proteins in ACC.



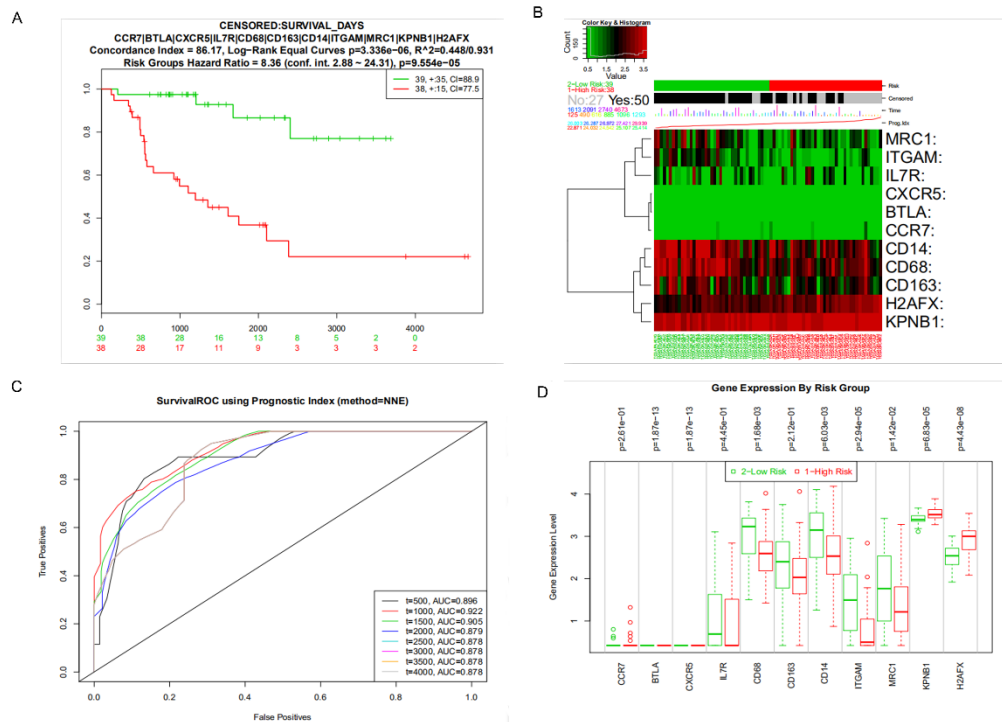

**Figure S9** The analysis results of SurvExpress database for external validation.

The analysis results of SurvExpress database suggested that these genes had significant predictive value for prognosis (Censoring event: overall death, Hazard Ratio = 8.36 (95% CI, 2.88 to 24.31),  $P < 0.001$ ) in external validation (A, B). The ROC curve showed decent predictive accuracy of the model (C) and the boxplot illustrated that CXCR5, CD68, CD14, ITGAM, MRC1 and H2AFX were differentially expressed between normal adrenal tissues and ACC (D).

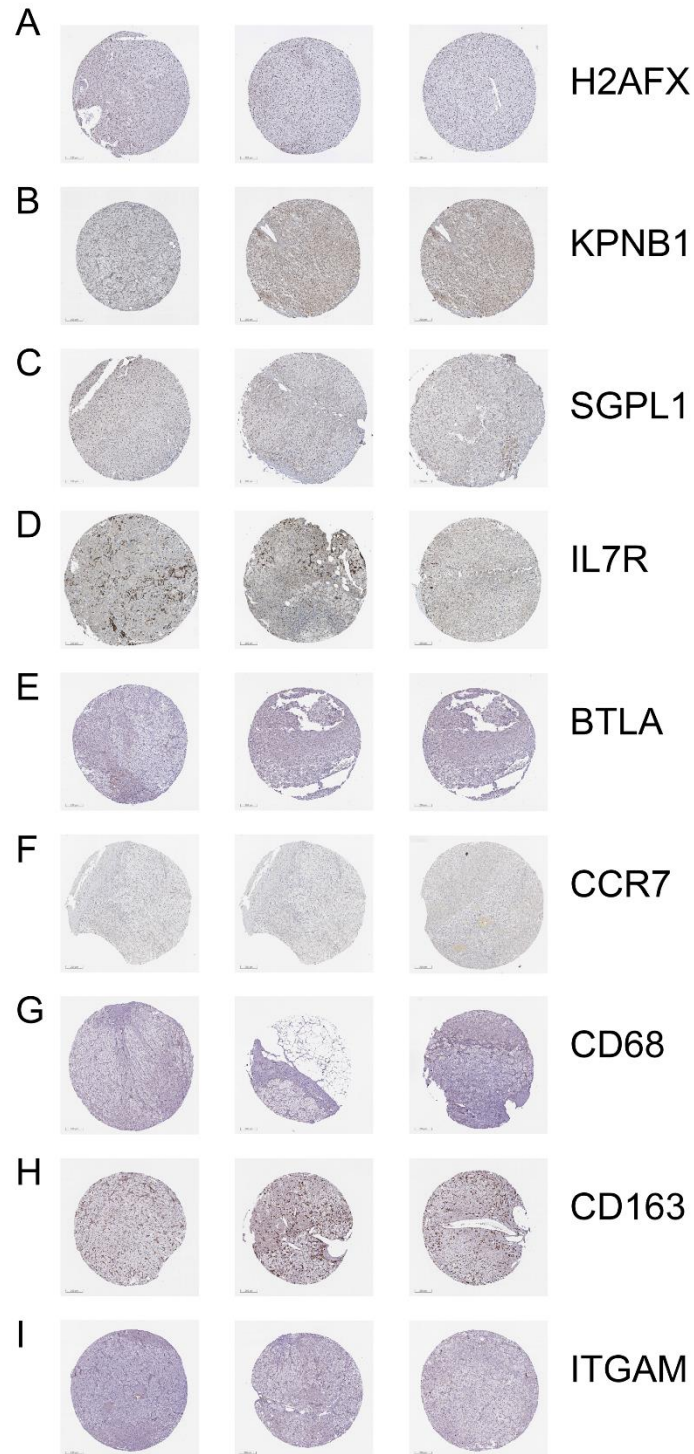

**Figure S10** The Human Protein Atlas data mining results.

The Human Protein Atlas data mining results showed that proteins of H2AFX (A), SGPL1 (C), IL7R (D), BTLA (E), CCR7 (F), CD68 (G), CD163 (H), ITGAM (I) could not be detected in normal tissues, and KPNB1 (B) had low expression in normal adrenal tissues.

**Table S1** Baseline information of 92 patients diagnosed with adrenal cortical carcinoma available from the TCGA

| Variables                 | Total Patients (N = 92) |
|---------------------------|-------------------------|
| <b>Age, years</b>         |                         |
| Mean $\pm$ SD             | 47.16 $\pm$ 16.21       |
| Median (Range)            | 48.50 (14 - 83)         |
| <b>Gender</b>             |                         |
| Female                    | 60 (65.22%)             |
| Male                      | 32 (34.78%)             |
| <b>Race</b>               |                         |
| Asian                     | 2 (2.17%)               |
| Black or African American | 1 (1.09%)               |
| White                     | 78 (84.78%)             |
| Unknown                   | 11 (11.96%)             |
| <b>Clinical M stage</b>   |                         |
| M1                        | 18 (19.57%)             |
| M0                        | 72 (78.26%)             |
| Unknown                   | 2 (2.17%)               |

**Abbreviations:** SD, Standard deviation.

**Table S2** The analysis results of OncomiR database

| miRNA Name     | Cancer Abbreviation | Clinical Parameter  | ANOVA P-value |
|----------------|---------------------|---------------------|---------------|
| hsa-miR-30d-5p | BLCA                | Histologic Grade    | 1.11E-08      |
| hsa-miR-30d-5p | KIRC                | Histologic Grade    | 5.23E-07      |
| hsa-miR-30d-5p | KICH                | Pathologic T Status | 2.76E-06      |
| hsa-miR-30d-5p | KIRC                | Pathologic T Status | 4.21E-06      |
| hsa-miR-30d-5p | STAD                | Histologic Grade    | 2.59E-05      |
| hsa-miR-30d-5p | BLCA                | Pathologic Stage    | 1.23E-04      |
| hsa-miR-30d-5p | TGCT                | Clinical T Status   | 1.99E-04      |
| hsa-miR-30d-5p | STAD                | Pathologic T Status | 4.80E-04      |
| hsa-miR-30d-5p | ESCA                | Pathologic T Status | 5.71E-04      |
| hsa-miR-30d-5p | BLCA                | Pathologic T Status | 7.67E-04      |
| hsa-miR-30d-5p | STAD                | Pathologic Stage    | 8.42E-04      |
| hsa-miR-30d-5p | BRCA                | Pathologic N Status | 2.63E-03      |
| hsa-miR-30d-5p | PAAD                | Histologic Grade    | 2.96E-03      |
| hsa-miR-30d-5p | LIHC                | Histologic Grade    | 4.29E-03      |
| hsa-miR-30d-5p | TGCT                | Pathologic T Status | 4.37E-03      |
| hsa-miR-30d-5p | BLCA                | Pathologic M Status | 1.71E-02      |
| hsa-miR-30d-5p | HNSC                | Pathologic T Status | 1.73E-02      |
| hsa-miR-30d-5p | LUAD                | Pathologic T Status | 1.85E-02      |

---

|                 |      |                     |          |
|-----------------|------|---------------------|----------|
| hsa-miR-30d-5p  | ACC  | Pathologic T Status | 2.23E-02 |
| hsa-miR-30d-5p  | KIRC | Pathologic M Status | 2.28E-02 |
| hsa-miR-30d-5p  | TGCT | Pathologic M Status | 2.33E-02 |
| hsa-miR-30d-5p  | TGCT | Clinical M Status   | 2.42E-02 |
| hsa-miR-30d-5p  | LUSC | Pathologic T Status | 2.84E-02 |
| hsa-miR-30d-5p  | HNSC | Clinical T Status   | 2.96E-02 |
| hsa-miR-30d-5p  | KICH | Pathologic M Status | 3.08E-02 |
| hsa-miR-30d-5p  | THCA | Pathologic T Status | 3.66E-02 |
| hsa-miR-30d-5p  | COAD | Pathologic Stage    | 3.69E-02 |
| hsa-miR-30d-5p  | LIHC | Pathologic Stage    | 4.20E-02 |
| hsa-miR-30d-5p  | LUSC | Sex                 | 4.34E-02 |
| hsa-miR-30d-5p  | ACC  | Clinical M Status   | 4.43E-02 |
| hsa-miR-30d-5p  | LUAD | Pathologic N Status | 4.73E-02 |
| hsa-miR-200c-3p | KIRC | Histologic Grade    | 4.50E-08 |
| hsa-miR-200c-3p | OV   | Histologic Grade    | 4.98E-08 |
| hsa-miR-200c-3p | STAD | Histologic Grade    | 1.57E-06 |
| hsa-miR-200c-3p | BLCA | Pathologic M Status | 4.84E-06 |
| hsa-miR-200c-3p | LGG  | Histologic Grade    | 5.89E-06 |
| hsa-miR-200c-3p | KIRP | Clinical N Status   | 7.67E-06 |
| hsa-miR-200c-3p | PAAD | Histologic Grade    | 1.09E-05 |

---

---

|                 |      |                     |          |
|-----------------|------|---------------------|----------|
| hsa-miR-200c-3p | KIRP | Pathologic N Status | 1.37E-05 |
| hsa-miR-200c-3p | BLCA | Histologic Grade    | 9.69E-05 |
| hsa-miR-200c-3p | BLCA | Pathologic Stage    | 1.12E-03 |
| hsa-miR-200c-3p | BLCA | Pathologic T Status | 1.19E-03 |
| hsa-miR-200c-3p | ACC  | Clinical M Status   | 1.32E-03 |
| hsa-miR-200c-3p | KIRP | Pathologic M Status | 1.61E-03 |
| hsa-miR-200c-3p | COAD | Pathologic M Status | 1.99E-03 |
| hsa-miR-200c-3p | STAD | Pathologic T Status | 2.24E-03 |
| hsa-miR-200c-3p | OV   | Clinical Stage      | 2.53E-03 |
| hsa-miR-200c-3p | UCEC | Histologic Grade    | 2.80E-03 |
| hsa-miR-200c-3p | READ | Pathologic M Status | 4.95E-03 |
| hsa-miR-200c-3p | KICH | Pathologic T Status | 6.39E-03 |
| hsa-miR-200c-3p | LUSC | Sex                 | 7.69E-03 |
| hsa-miR-200c-3p | STAD | Pathologic N Status | 8.12E-03 |
| hsa-miR-200c-3p | STAD | Pathologic Stage    | 9.46E-03 |
| hsa-miR-200c-3p | LIHC | Pathologic T Status | 9.60E-03 |
| hsa-miR-200c-3p | PAAD | Pathologic M Status | 1.02E-02 |
| hsa-miR-200c-3p | LIHC | Histologic Grade    | 1.03E-02 |
| hsa-miR-200c-3p | LIHC | Pathologic Stage    | 1.45E-02 |
| hsa-miR-200c-3p | ACC  | Pathologic Stage    | 1.54E-02 |

---

---

|                 |      |                     |          |
|-----------------|------|---------------------|----------|
| hsa-miR-200c-3p | TGCT | Pathologic M Status | 1.96E-02 |
| hsa-miR-200c-3p | TGCT | Pathologic Stage    | 2.00E-02 |
| hsa-miR-200c-3p | BRCA | Pathologic T Status | 2.07E-02 |
| hsa-miR-200c-3p | KIRP | Clinical T Status   | 2.24E-02 |
| hsa-miR-200c-3p | UCS  | Clinical Stage      | 2.53E-02 |
| hsa-miR-200c-3p | KIRP | Sex                 | 2.86E-02 |
| hsa-miR-200c-3p | LIHC | Sex                 | 2.87E-02 |
| hsa-miR-200c-3p | TGCT | Clinical Stage      | 2.96E-02 |
| hsa-miR-200c-3p | UCEC | Clinical Stage      | 3.49E-02 |
| hsa-miR-200c-3p | LUAD | Sex                 | 3.92E-02 |
| hsa-miR-200c-3p | CHOL | Histologic Grade    | 3.96E-02 |
| hsa-miR-200c-3p | KIRP | Pathologic Stage    | 4.30E-02 |
| hsa-miR-200c-3p | TGCT | Pathologic N Status | 4.82E-02 |

---

**Abbreviations:** ACC: adrenocortical carcinoma; BLCA: bladder urothelial carcinoma; BRCA: breast invasive carcinoma; CHOL: cholangiocarcinoma; COAD: colon adenocarcinoma; KICH: kidney chromophobe; KIRC: kidney renal clear cell carcinoma; KIRP: kidney renal papillary cell carcinoma; LGG: brain lower grade glioma; LIHC: liver hepatocellular carcinoma; LUAD: lung adenocarcinoma; LUSC: lung squamous cell carcinoma; OV: ovarian serous cystadenocarcinoma; PAAD: pancreatic adenocarcinoma; READ: rectal adenocarcinoma; STAD: stomach adenocarcinoma; TGCT: testicular germ cell tumors; UCEC: uterine corpus endometrial carcinoma; UCS: uterine carcinosarcoma
